# Supplementary material
Source: PubMed Central journal article supplement (PMC6293989)

**Fig. 1**

**Fig. 1b**

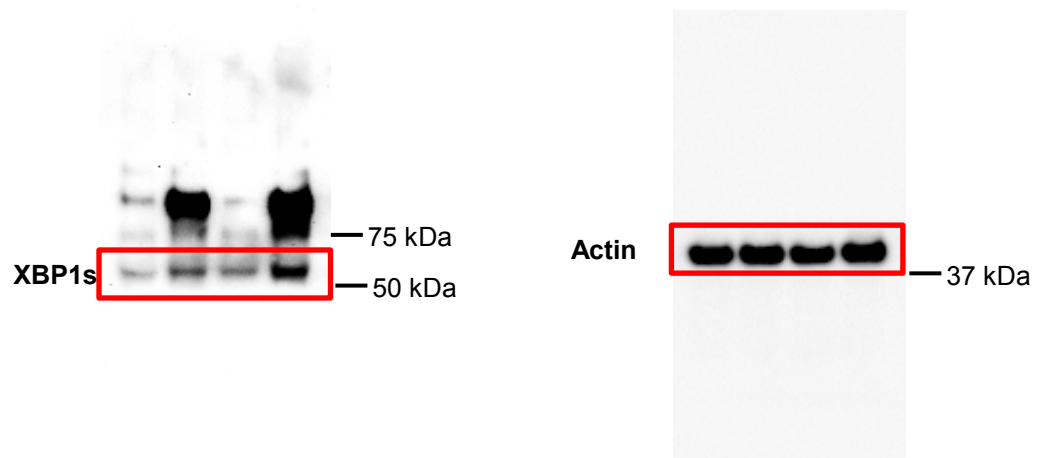

**Fig. 2**

**Fig. 2b**

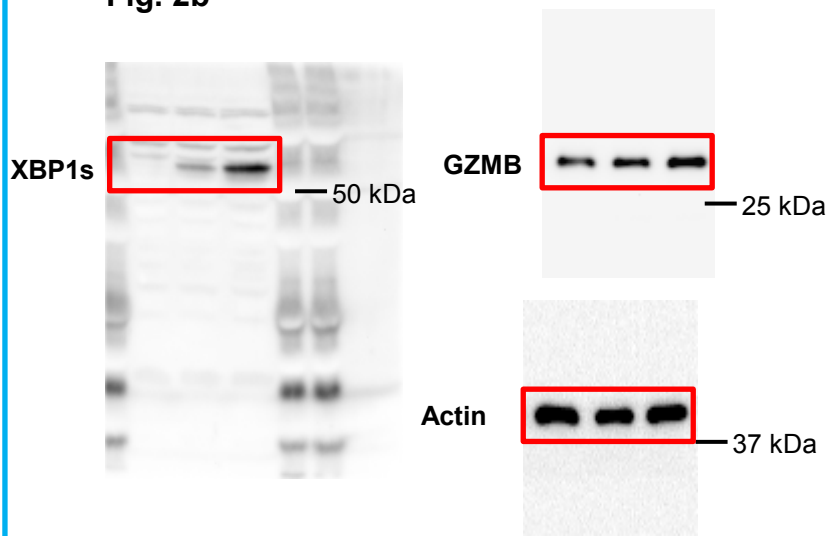

**Fig. 2**

**Fig. 2e**

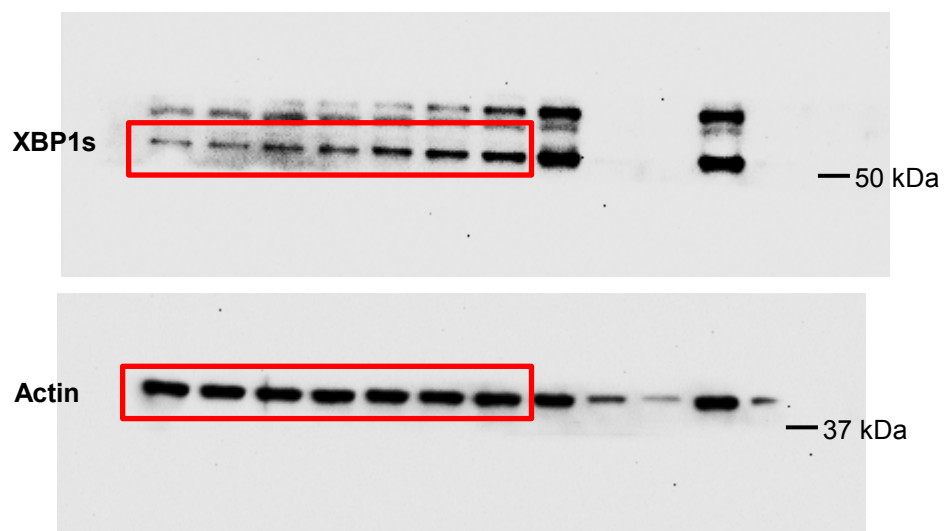

# Fig. 3

Fig. 3a

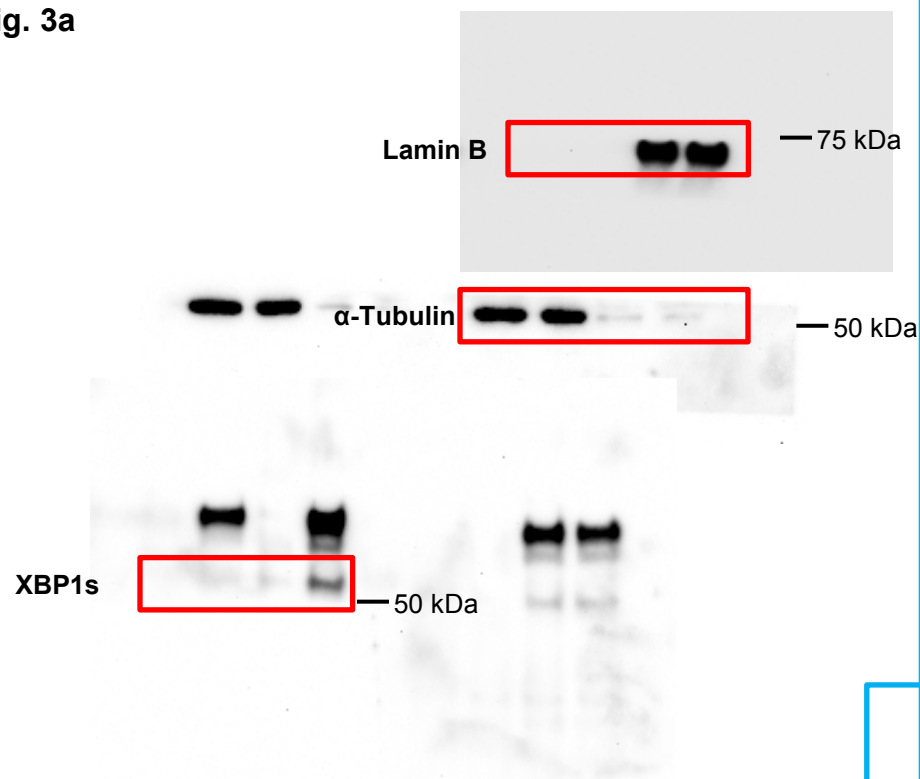

Fig. 3b

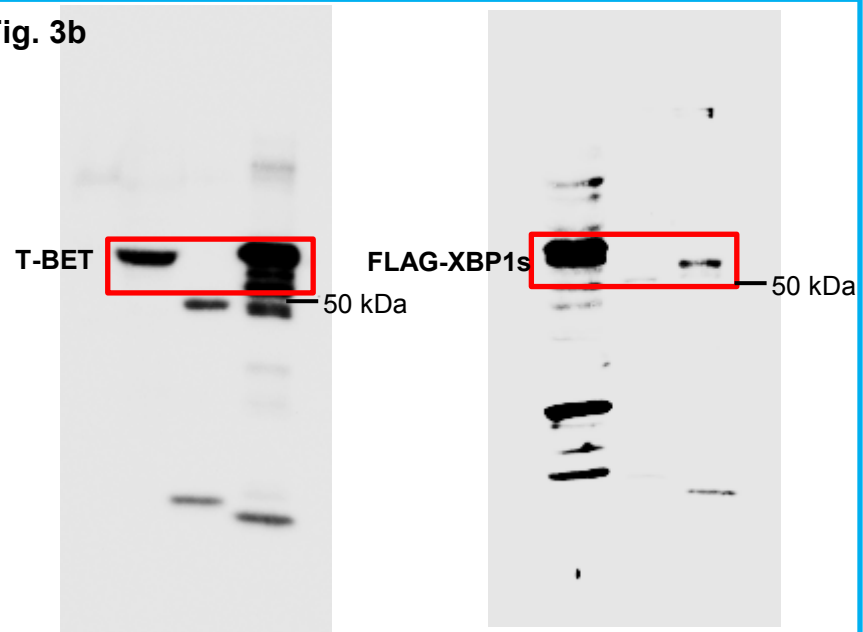

Fig. 3e

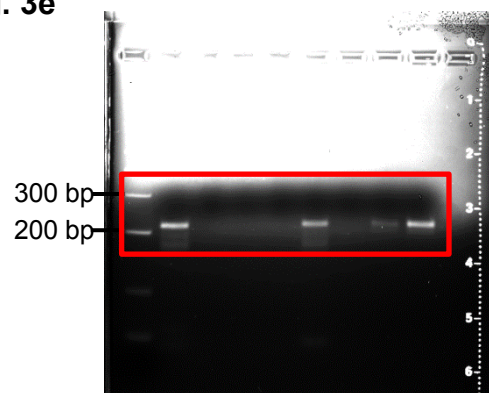

Fig. 3c

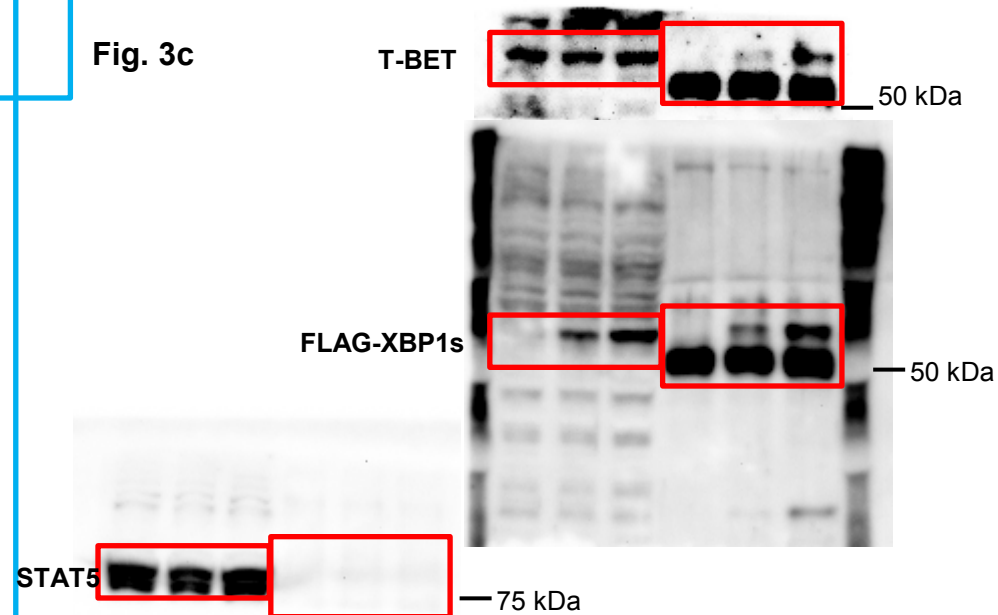

# Fig. 4

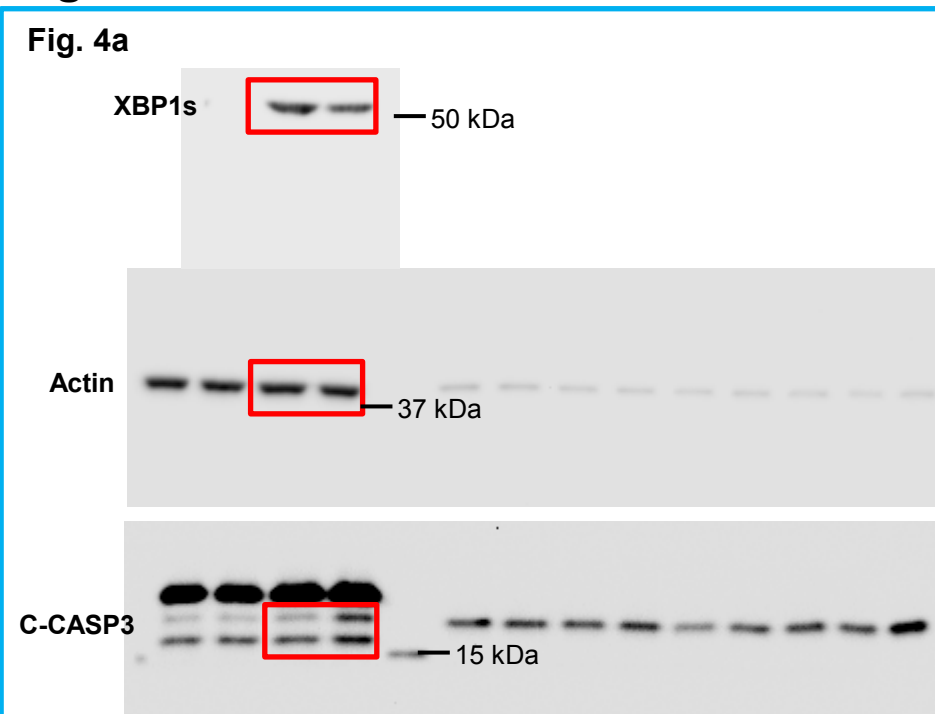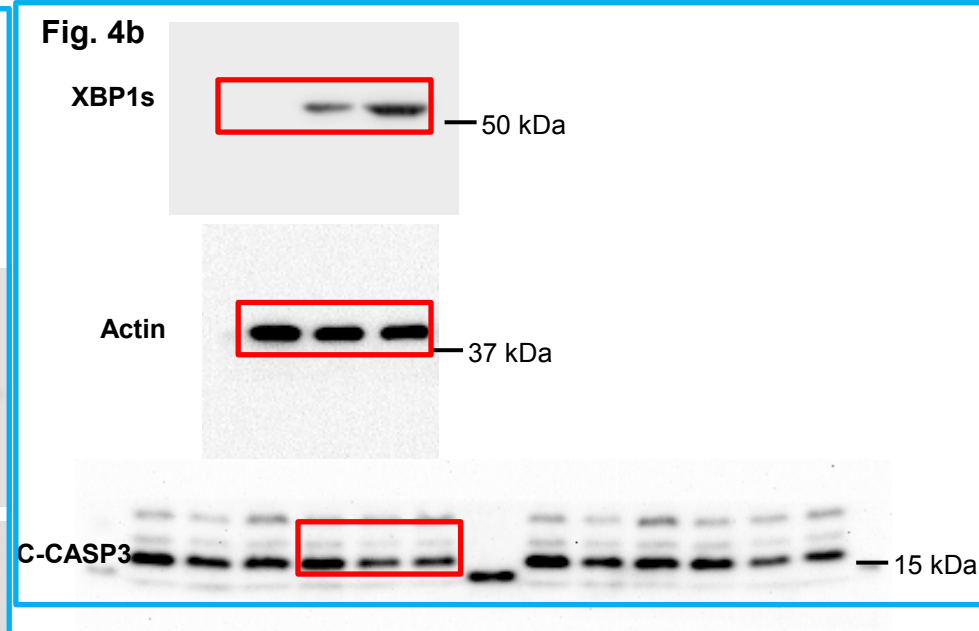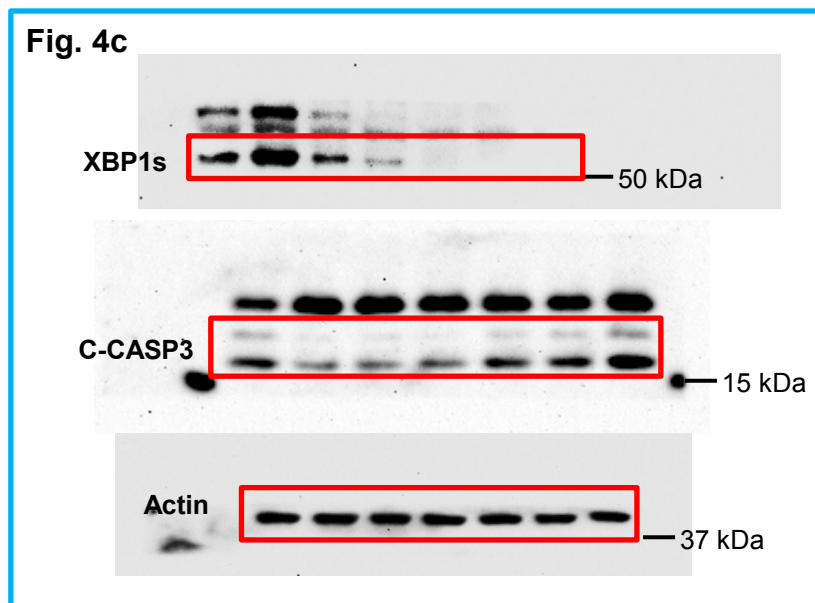

**Fig. 5**

**Fig. 5a**

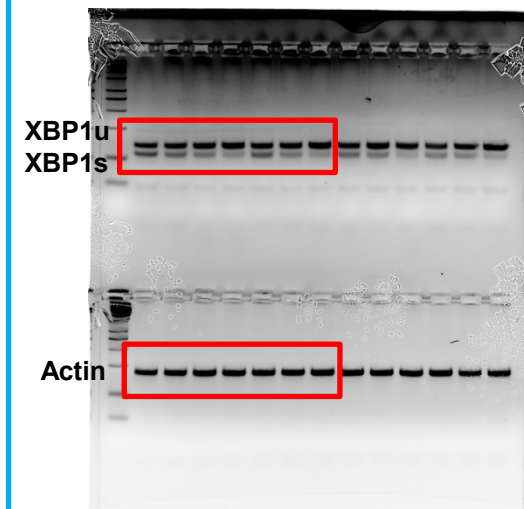

**Fig. 5b**

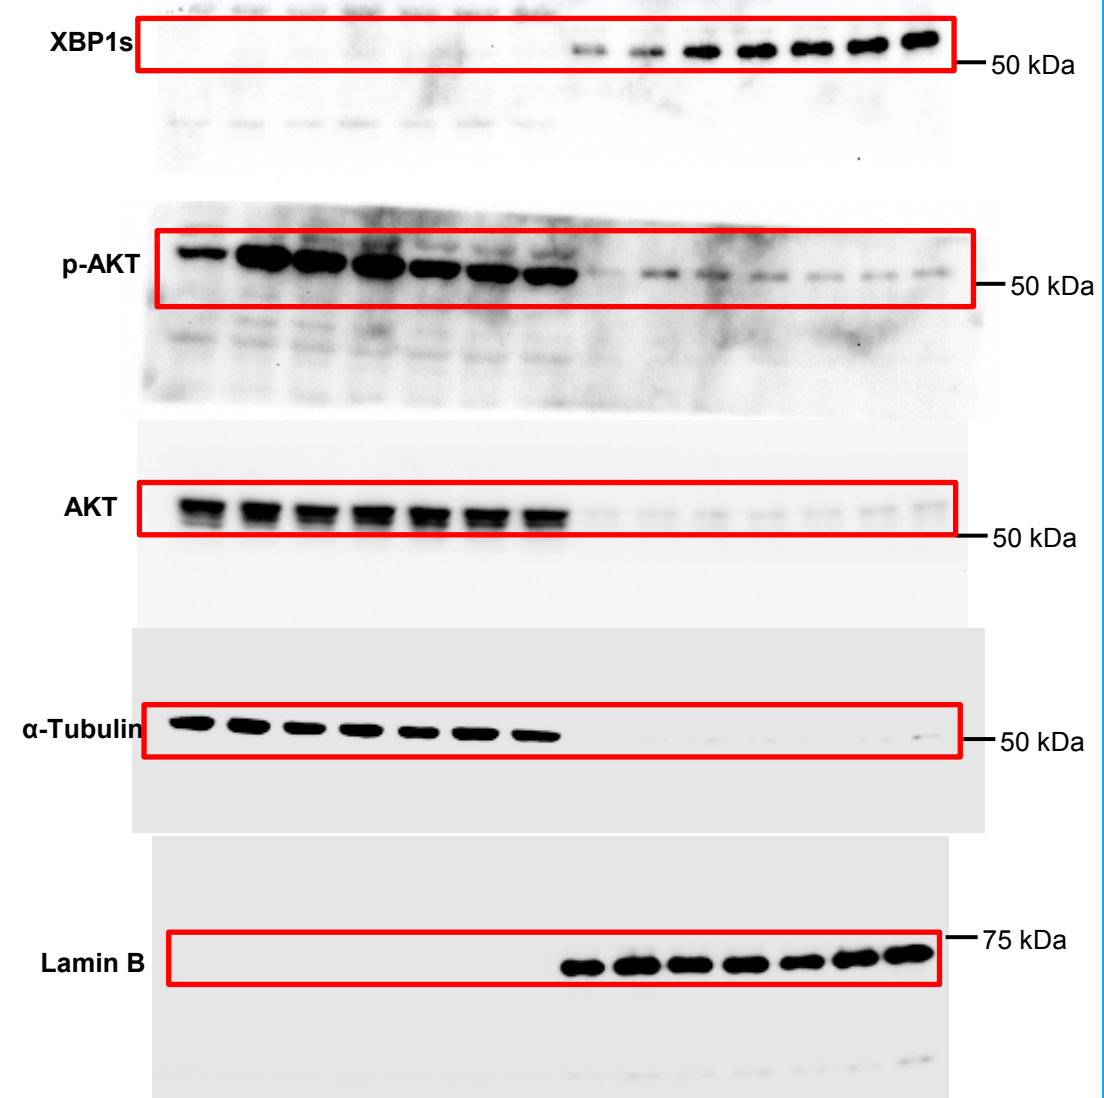

**Fig. 5c**

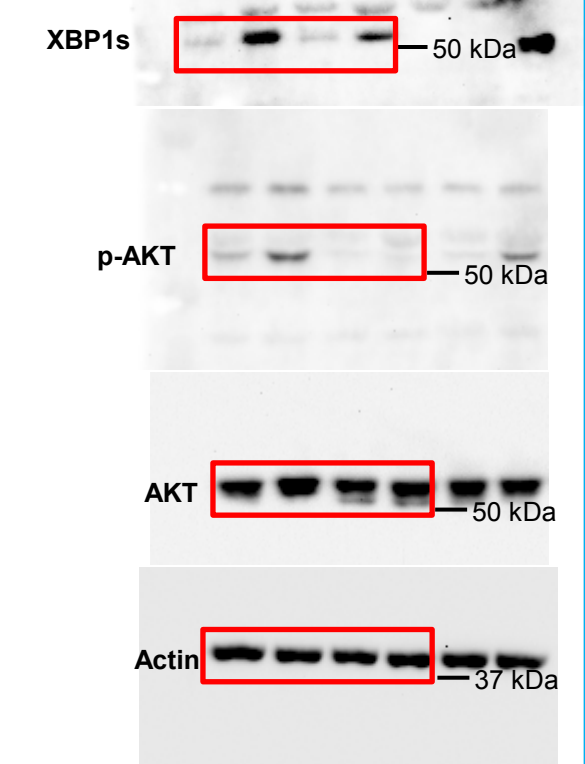

**Fig. 5****Fig. 5d**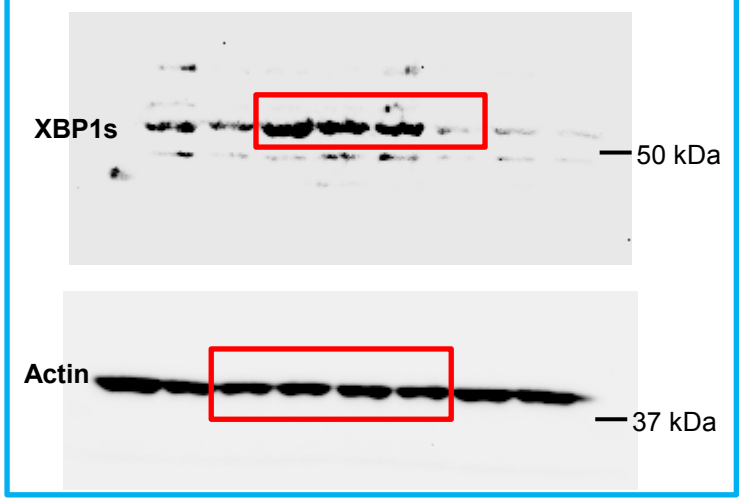**Fig. 5e**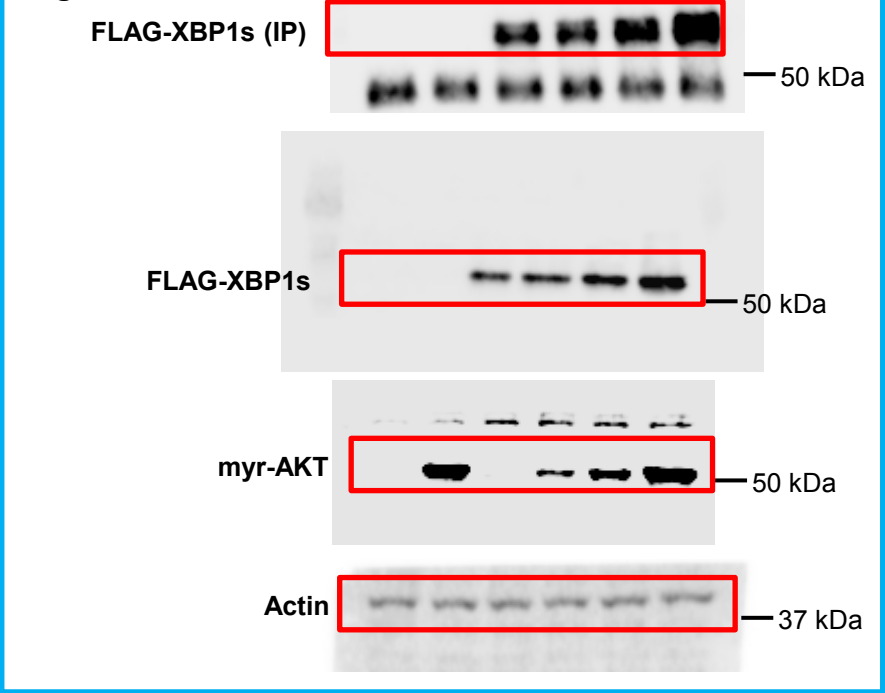**Fig. 5g**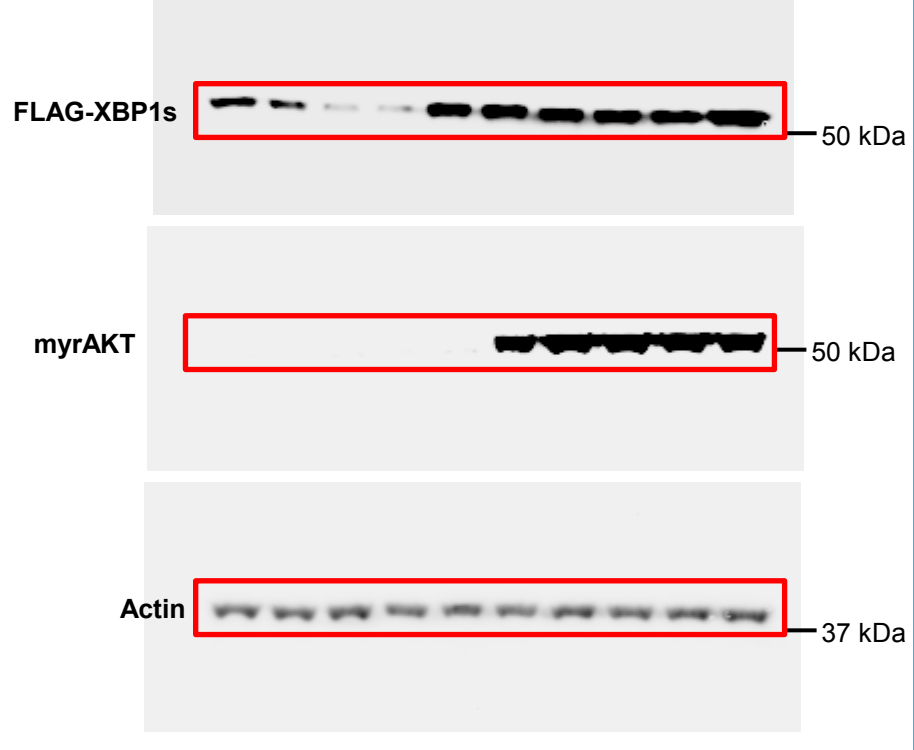**Fig. 5h**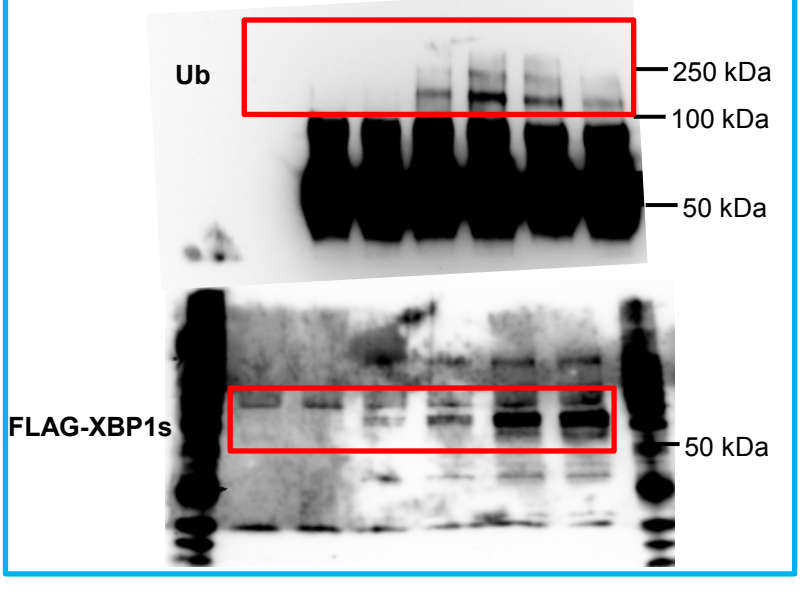

**Fig. 5**

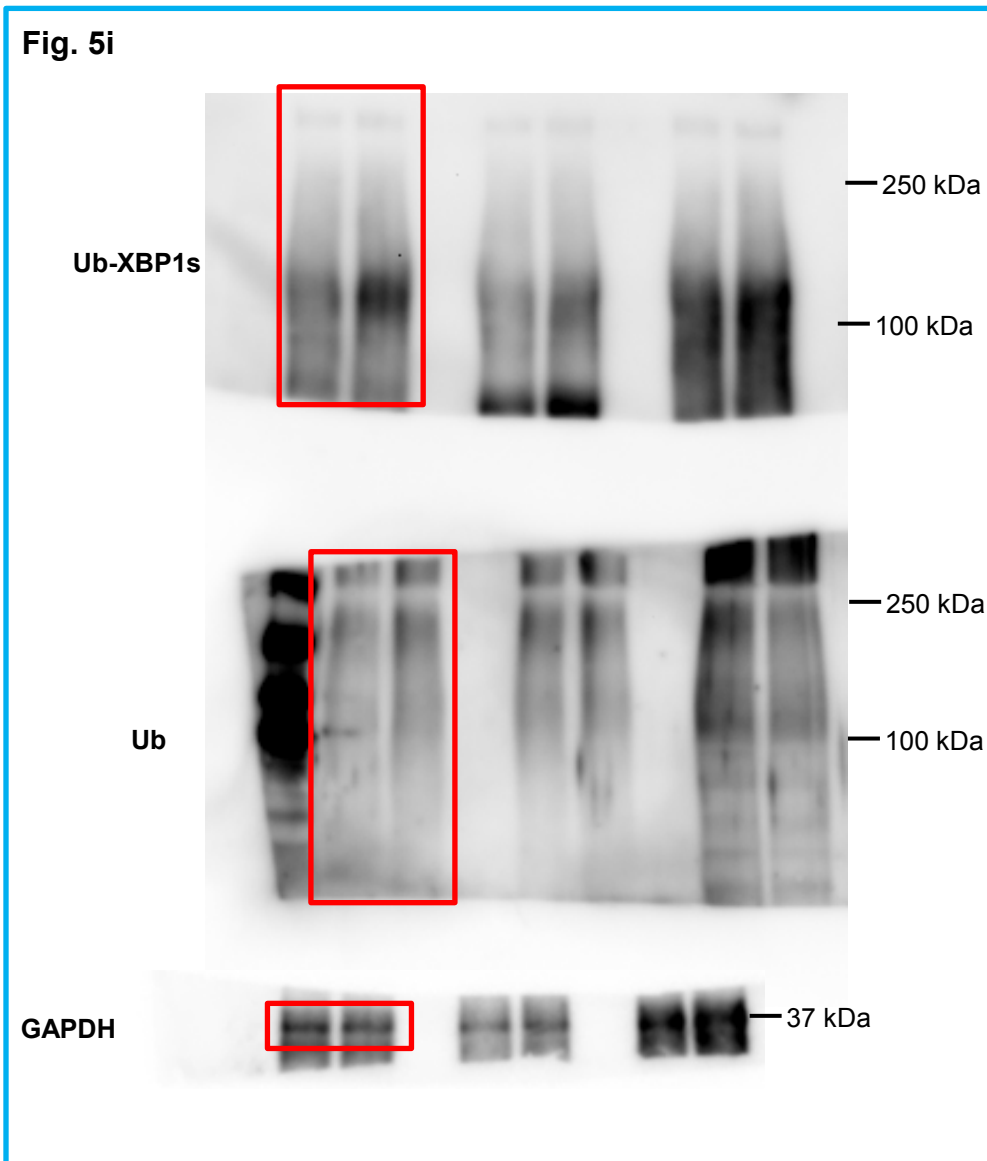

# Supplementary Fig. 2

## Supplementary Fig. 2b

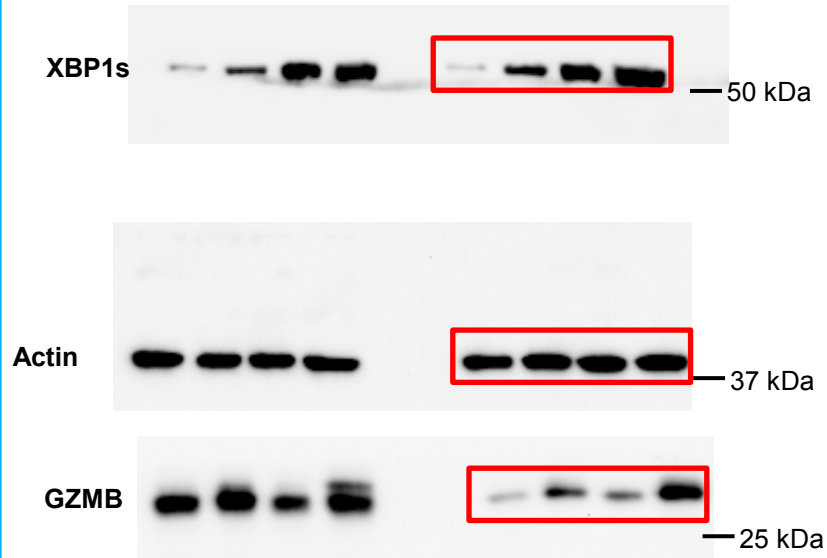

## Supplementary Fig. 2g

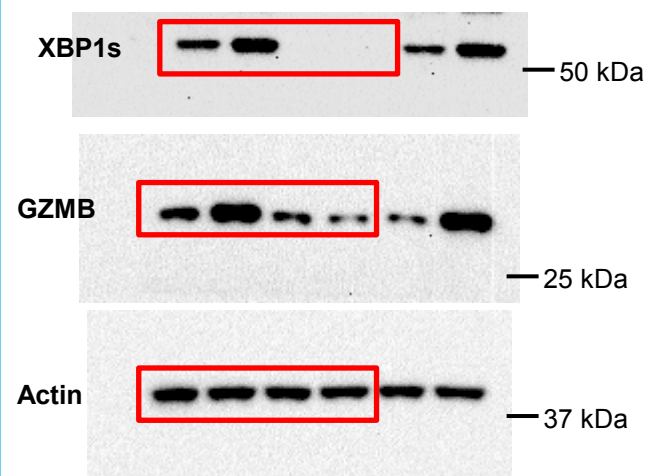

## Supplementary Fig. 2d

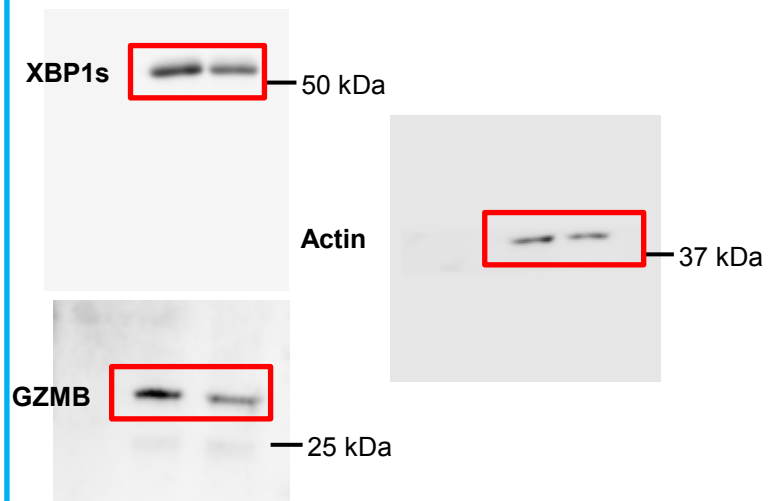

# Supplementary Fig. 4

Supplementary Fig. 4a

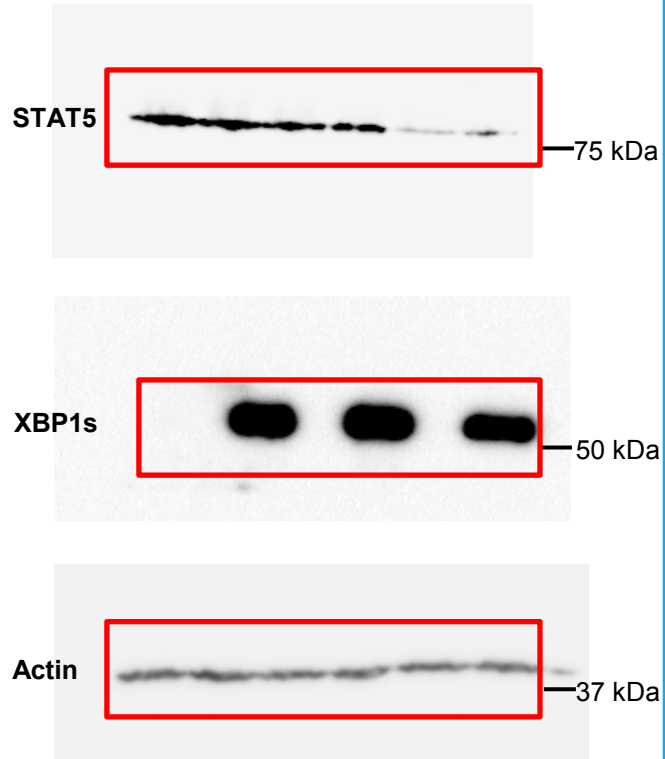



# Supplementary Fig. 6

Supplementary Fig. 6c

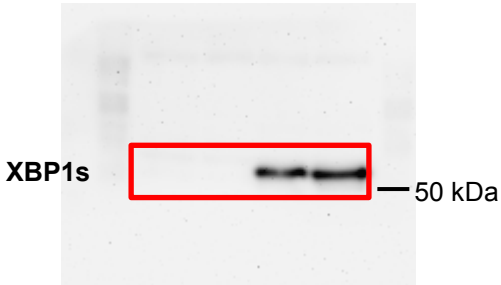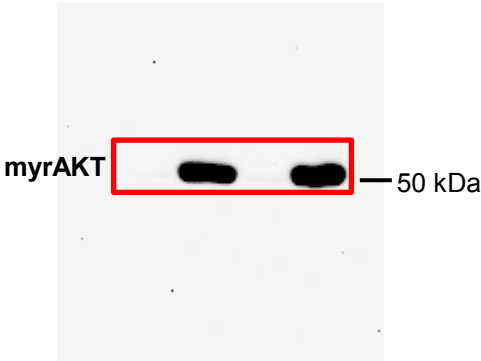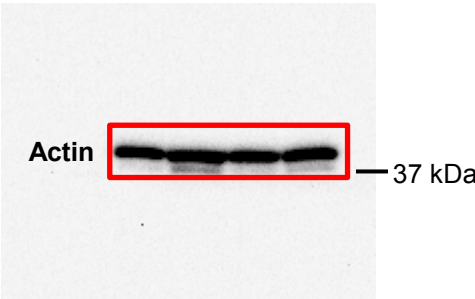

Supplement: NIHMS1510059-supplement-3.pdf [file NIHMS1510059-supplement-3.pdf]
