# Supplementary material
Source: PubMed Central journal article supplement (PMC6293989)
Supplement: NIHMS1510059-supplement-2.pdf [file NIHMS1510059-supplement-2.pdf]

## Reporting Summary

Nature Research wishes to improve the reproducibility of the work that we publish. This form provides structure for consistency and transparency in reporting. For further information on Nature Research policies, see [Authors & Referees](#) and the [Editorial Policy Checklist](#).

### Statistical parameters

When statistical analyses are reported, confirm that the following items are present in the relevant location (e.g. figure legend, table legend, main text, or Methods section).

n/a | Confirmed

- The exact sample size ( $n$ ) for each experimental group/condition, given as a discrete number and unit of measurement
- An indication of whether measurements were taken from distinct samples or whether the same sample was measured repeatedly
- The statistical test(s) used AND whether they are one- or two-sided  
*Only common tests should be described solely by name; describe more complex techniques in the Methods section.*
- A description of all covariates tested
- A description of any assumptions or corrections, such as tests of normality and adjustment for multiple comparisons
- A full description of the statistics including central tendency (e.g. means) or other basic estimates (e.g. regression coefficient) AND variation (e.g. standard deviation) or associated estimates of uncertainty (e.g. confidence intervals)
- For null hypothesis testing, the test statistic (e.g.  $F$ ,  $t$ ,  $r$ ) with confidence intervals, effect sizes, degrees of freedom and  $P$  value noted  
*Give  $P$  values as exact values whenever suitable.*
- For Bayesian analysis, information on the choice of priors and Markov chain Monte Carlo settings
- For hierarchical and complex designs, identification of the appropriate level for tests and full reporting of outcomes
- Estimates of effect sizes (e.g. Cohen's  $d$ , Pearson's  $r$ ), indicating how they were calculated
- Clearly defined error bars  
*State explicitly what error bars represent (e.g. SD, SE, CI)*

*Our web collection on [statistics for biologists](#) may be useful.*

### Software and code

Policy information about [availability of computer code](#)

#### Data collection

No customized software was used; BD FACSDiva version 6 was used to collect flow cytometric data; Applied Biosystems StepOnePlus real-time PCR system and associated software were used to collect real-time PCR data; Promega GloMax® 96 Luminometer and associated software were used to collect luciferase data; microscope data were collected using Zeiss ZEN and associated software (blue edition). Western blot data were collected by FlourChem E system. Additional information about software was described in the manuscript or available upon request.

#### Data analysis

No custom-made software was used for data analysis. Statistical analyses were performed using R3.4.0, SAS 9.3, Microsoft Excel 2016 or Graphpad Prism 7. The microscope images were analyzed using Zeiss ZEN software (blue edition). Flow cytometry data were analyzed using Flowjo 7.6 or 10.0. Immunoblot data analysis was performed using AlphaView software (version 3.2.2.0).

For manuscripts utilizing custom algorithms or software that are central to the research but not yet described in published literature, software must be made available to editors/reviewers upon request. We strongly encourage code deposition in a community repository (e.g. GitHub). See the Nature Research [guidelines for submitting code & software](#) for further information.

## Data

Policy information about [availability of data](#)

All manuscripts must include a [data availability statement](#). This statement should provide the following information, where applicable:

- Accession codes, unique identifiers, or web links for publicly available datasets
- A list of figures that have associated raw data
- A description of any restrictions on data availability

All summary or representative data generated and supporting the findings of this study are available within the paper. Raw data that support the findings of this study are available upon request.

## Field-specific reporting

Please select the best fit for your research. If you are not sure, read the appropriate sections before making your selection.

Life sciences  Behavioural & social sciences  Ecological, evolutionary & environmental sciences

For a reference copy of the document with all sections, see [nature.com/authors/policies/ReportingSummary-flat.pdf](https://www.nature.com/authors/policies/ReportingSummary-flat.pdf)

## Life sciences study design

All studies must disclose on these points even when the disclosure is negative.

|                 |                                                                                                                                                                                                                                                                                                                                                                                                                                                                                                                                                                                                                                               |
|-----------------|-----------------------------------------------------------------------------------------------------------------------------------------------------------------------------------------------------------------------------------------------------------------------------------------------------------------------------------------------------------------------------------------------------------------------------------------------------------------------------------------------------------------------------------------------------------------------------------------------------------------------------------------------|
| Sample size     | Most of our experiments are in vitro experiments using donor primary cells. Sample sizes were chosen on the basis of our previous studies or publications, as well as the availability of donors. As a result, assuming a CV of 30%, with 3-9 donors, we were able to detect a group difference of 2-2.5 fold with at least 80% power and type I error controlled at 0.05, after adjusting for multiple comparisons. For simplicity, paired t test or Student's t test was used for the power analysis.                                                                                                                                       |
| Data exclusions | No data were excluded for all figures.                                                                                                                                                                                                                                                                                                                                                                                                                                                                                                                                                                                                        |
| Replication     | All experiments were reliably reproduced and results are represented as mean +/- SEM or +/-SD as appropriate, which is indicated in figure legends. Student's t-tests or paired t-tests were used to compare two independent or two paired groups, respectively. Linear mixed model was used to compare three or more groups with repeated measures from the same donors. A two-way ANOVA model was used to test synergistic effects. P values were adjusted for multiple comparisons using Holm's procedure. A P value of 0.05 or less was considered statistically significant, which is described in the methods section of the main text. |
| Randomization   | Leukopaks used to isolate NK cells were de-identified and randomly picked up. For the experiments with a small sample size, randomization was not used.                                                                                                                                                                                                                                                                                                                                                                                                                                                                                       |
| Blinding        | Considering appropriate handling and data acquisition, investigators were not blinded to the studies. Moreover, because samples were treated equally and data collection and/or analysis were mainly performed by computer-based methods (such as flow cytometric analysis), we believe the blinding was not necessary to our study.                                                                                                                                                                                                                                                                                                          |

## Reporting for specific materials, systems and methods

### Materials & experimental systems

| n/a                                 | Involvement in the study                                        |
|-------------------------------------|-----------------------------------------------------------------|
| <input checked="" type="checkbox"/> | <input type="checkbox"/> Unique biological materials            |
| <input type="checkbox"/>            | <input checked="" type="checkbox"/> Antibodies                  |
| <input type="checkbox"/>            | <input checked="" type="checkbox"/> Eukaryotic cell lines       |
| <input checked="" type="checkbox"/> | <input type="checkbox"/> Palaeontology                          |
| <input checked="" type="checkbox"/> | <input type="checkbox"/> Animals and other organisms            |
| <input type="checkbox"/>            | <input checked="" type="checkbox"/> Human research participants |

### Methods

| n/a                                 | Involvement in the study                           |
|-------------------------------------|----------------------------------------------------|
| <input checked="" type="checkbox"/> | <input type="checkbox"/> ChIP-seq                  |
| <input type="checkbox"/>            | <input checked="" type="checkbox"/> Flow cytometry |
| <input checked="" type="checkbox"/> | <input type="checkbox"/> MRI-based neuroimaging    |

## Antibodies

Antibodies used

Anti-ACTIN (clone I-19; sc-1616; Santa Cruz Biotech)  
Applications: Immunoblotting (IF, 1:1000 dilution); Immunofluorescence (1:200 dilution): <https://datasheets.scbt.com/sc-1616.pdf>

Anti-Lamin B (clone C-20; sc-6216; Santa Cruz Biotech): <http://datasheets.scbt.com/sc-6216.pdf>  
Applications: Immunoblotting (1:1000 dilution)

Anti-XBP1 (clone M-186; sc-7160; Santa Cruz Biotech): <http://datasheets.scbt.com/sc-7160.pdf>  
Applications: IF (1:100 dilution)

Anti-T-BET (clone 4B10; sc-21749; Santa Cruz Biotech): <http://datasheets.scbt.com/sc-21749.pdf>  
Applications: IP (immunoprecipitation, 2 µg per 100-500 µg protein samples), IF (1:100 dilution)

Anti-ubiquitinated proteins antibody (clone FK2; 04-263; Millipore): [http://www.merckmillipore.com/CN/zh/product/Anti-Ubiquitinated-proteins-Antibody-clone-FK2,MM\\_NF-04-263](http://www.merckmillipore.com/CN/zh/product/Anti-Ubiquitinated-proteins-Antibody-clone-FK2,MM_NF-04-263)  
Applications: IP (2 µg per 100-500 µg protein sample per sample in our study)

hCD3 (clone SK7; 560176; BD Bioscience): <http://www.bdbiosciences.com/ds/pm/tds/560176.pdf>  
Applications: Flow cytometry (5 ul/test)

hCD56 (clone B159; 557699; BD Bioscience): <http://www.bdbiosciences.com/ds/pm/tds/557699.pdf>  
Applications: Flow cytometry (5 ul/test)

hCD107a (clone H4A3; 560664; BD Bioscience): <http://www.bdbiosciences.com/ds/pm/tds/560664.pdf>  
Applications: Flow cytometry (5 ul/test)

hCD107a (clone H4A3; 561343; BD Bioscience): <http://www.bdbiosciences.com/ds/pm/tds/561343.pdf>  
Applications: Flow cytometry (5 ul/test)

XBP1s (clone Q3-695; 563382; BD Bioscience): <http://www.bdbiosciences.com/ds/pm/tds/563382.pdf>  
Applications: Flow cytometry (5 ul/test)

Mouse IgG1, kappa monoclonal isotype control (ab18443; Abcam): <https://www.abcam.com/Mouse-IgG1-kappa-monoclonal-MOPC-21-isotype-control-ab18443.html>  
Applications: IP (2 µg per 100-500 µg protein sample)

Anti-p-AKT (clone D9E; S473; CST) (4060S): <https://media.cellsignal.com/pdf/4060.pdf>  
Applications: Immunoblotting (1:1000 dilution)

Anti-AKT (clone 11E7; 4685S; CST): <https://media.cellsignal.com/pdf/4685.pdf>  
Applications: Immunoblotting (1:1000 dilution)

Anti-α-Tubulin (clone DM1A; 3873S; CST): <https://media.cellsignal.com/pdf/3873.pdf>  
Applications: Immunoblotting (1:1000 dilution), IF (1:200 dilution)

Anti-FLAG (clone D6W5B; 14793S; CST): <https://media.cellsignal.com/pdf/14793.pdf>  
Applications: Immunoblotting (1:1000 dilution), IP (1:100 dilution), IF (1:200 dilution)

Anti-STAT5 (no clone information; 9363S; CST): <https://media.cellsignal.com/pdf/9363.pdf>  
Applications: Immunoblotting (1:1000 dilution), ChIP (1:50 dilution)

Anti-GZMB (no clone information; 4275S; CST): <https://media.cellsignal.com/pdf/4275.pdf>  
Applications: Immunoblotting (1:1000 dilution)

Anti-Ubiquitin (no clone information; 3933S; CST): <https://media.cellsignal.com/pdf/3933.pdf>  
Applications: Immunoblotting (1:1000 dilution)

Anti-T-BET (clone D6N8B; 13232S; CST): <https://media.cellsignal.com/pdf/13232.pdf>  
Applications: IF (1:400 dilution), ChIP (1:50 dilution)

Anti-C-CASP3 (clone Asp175; 9664S; CST): <https://media.cellsignal.com/pdf/9664.pdf>  
Applications: Immunoblotting (1:1000 dilution)

Anti-XBP1s (clone Poly6195; 619502; BioLegend): <https://www.biolegend.com/de-de/products/purified-anti-xbp-1s-antibody-2182>  
Applications: Immunoblotting (1:1000 dilution), ChIP (1-2 ug per sample)

Anti-HA (clone polyclonal; H6908 Sigma): <https://www.sigmaaldrich.com/catalog/product/sigma/h6908?lang=zh&region=CN>  
Applications: Immunoblotting (1:1000 dilution)

Anti-GAPDH (clone D16H11; 5174S; CST): <https://media.cellsignal.com/pdf/5174.pdf>  
Applications: Immunoblotting (1:1000 dilution)

hGZMB (clone GB11; 560212; BD bioscience): <http://www.bdbiosciences.com/ds/pm/tds/560212.pdf>  
Applications: Flow cytometry (0.2 mg/ml)

hCD56 (clone B159; 560360; BD bioscience): <http://www.bdbiosciences.com/ds/pm/tds/560360.pdf>  
Applications: Flow cytometry (5 ul/test)

Donkey anti-goat IgG-HRP (sc-2020; Santa Cruz Biotech): <https://datasheets.scbt.com/sc-2020.pdf>  
Applications: Immunoblotting (1: 10,000)

Rabbit IgG HRP Linked Whole Ab (NA934-1ML; E Healthcare): <https://www.sigmaaldrich.com/catalog/product/sigma/gena9341ml?lang=zh&region=CN>  
Applications: Immunoblotting (1: 10,000)

Mouse IgG HRP Linked Whole Ab (NA931-1ML; GE Healthcare): <https://www.sigmaaldrich.com/catalog/product/sigma/gena9311ml?lang=zh&region=CN>  
Applications: Immunoblotting (1: 10,000)

## Validation

No customized antibodies were used. Validation data about the antibodies purchased from commercial vendors are available on the manufactures' website (see antibodies used for the link of each antibody) and/or datasheets sent to us. We used primary human cells or cell lines that are known to be positive for a specific antigen or target protein for validation of antibodies that were used for flow cytometry and immunoblotting.

## Eukaryotic cell lines

### Policy information about cell lines

#### Cell line source(s)

The K562 and NK-92 cell lines were purchased from ATCC. The U937, MM.1S, and MOLM-13 cell lines were obtained from the Caligiuri laboratory.

#### Authentication

Cell lines were not independently authenticated, beyond the identity provided from the supplier (e.g., ATCC).

|                                                                      |                                                                                                                  |
|----------------------------------------------------------------------|------------------------------------------------------------------------------------------------------------------|
| Mycoplasma contamination                                             | Stocks of all cell lines were tested for mycoplasma contamination prior to use in this study. All were negative. |
| Commonly misidentified lines<br>(See <a href="#">ICLAC</a> register) | No cell lines used in this study are in the database of commonly misidentified cell lines.                       |

## Human research participants

Policy information about [studies involving human research participants](#)

|                            |                                                                                                                                                                                      |
|----------------------------|--------------------------------------------------------------------------------------------------------------------------------------------------------------------------------------|
| Population characteristics | We purchased leukopaks from the American Red Cross or obtained samples from OSU Comprehensive Leukemia Tissue Banks. All samples are de-identified and no populations were excluded. |
| Recruitment                | Recruitment is not relevant to this study. There are no clinical trials involved, and the majority of samples were purchased from the American Red Cross.                            |

## Flow Cytometry

### Plots

Confirm that:

- The axis labels state the marker and fluorochrome used (e.g. CD4-FITC).
- The axis scales are clearly visible. Include numbers along axes only for bottom left plot of group (a 'group' is an analysis of identical markers).
- All plots are contour plots with outliers or pseudocolor plots.
- A numerical value for number of cells or percentage (with statistics) is provided.

### Methodology

|                           |                                                                                                                                                                                                                                                                                                                                                                                                                                                                                                                                                                                                                                                                                                                                                                              |
|---------------------------|------------------------------------------------------------------------------------------------------------------------------------------------------------------------------------------------------------------------------------------------------------------------------------------------------------------------------------------------------------------------------------------------------------------------------------------------------------------------------------------------------------------------------------------------------------------------------------------------------------------------------------------------------------------------------------------------------------------------------------------------------------------------------|
| Sample preparation        | Cells were labeled with monoclonal antibodies at room temperature for 15 minutes and washed with PBS containing 2% BSA prior to analysis using an LSRII flow cytometer (BD Biosciences) to detect surface expression of each antigen. The NK cells were gated as CD56-FITC(+)CD3-APC-H7(-) lymphocytes. For CD107a assays, NK cells were co-cultured with tumor cells for 4 h in the presence of GolgiStop (BD), followed by staining with an anti-CD107a-APC or anti-CD107a-APC-H7 antibody. For the intracellular flow cytometric analysis, cells were permeabilized and fixed using a Foxp3/Transcription Factor Fixation/Permeabilization kit (eBioscience), followed by staining with anti-XBP1s-V450 or anti-GZMB-APC antibodies. Data were analyzed using FlowJo v10. |
| Instrument                | Samples were analyzed on an LSRII (BD) or FACSAria II unit (BD)                                                                                                                                                                                                                                                                                                                                                                                                                                                                                                                                                                                                                                                                                                              |
| Software                  | Data were collected using FACSDiva (BD) and analyzed using FACSDiva (BD) or FlowJo v7.6 or v10. Graphing and statistical analysis were performed using Prism 7 (GraphPad).                                                                                                                                                                                                                                                                                                                                                                                                                                                                                                                                                                                                   |
| Cell population abundance | When applicable, cell populations were sorted to >95% purity in all experiments, as determined by flow cytometry.                                                                                                                                                                                                                                                                                                                                                                                                                                                                                                                                                                                                                                                            |
| Gating strategy           | Unless otherwise indicated, positive and negative gates were set using fluorophore-matched IgG controls. NK cells including those co-cultured with tumor cells were gated on CD3 negative and CD56 positive.                                                                                                                                                                                                                                                                                                                                                                                                                                                                                                                                                                 |

Tick this box to confirm that a figure exemplifying the gating strategy is provided in the Supplementary Information.
